# Supplementary material
Source: ML conference proceedings conference paper supplement (https://openaccess.thecvf.com/content/ICCV_2017/html/Xiong_Spatiotemporal_Modeling_for_ICCV_2017_paper.html)
Supplement: Supplementary file 1 [file Xiong_Spatiotemporal_Modeling_for_ICCV_2017_supplemental.pdf]

Archive with 11 entries (8 files):
- video demos/
- video demos/Descriptions.pdf
- __MACOSX/
- __MACOSX/video demos/
- __MACOSX/video demos/._Descriptions.pdf
- video demos/ucsd_test1.avi
- video demos/ucsd_test2.avi
- video demos/ucsd_test3.avi
- video demos/ucsd_test4.avi
- video demos/ucsd_test5.avi
- video demos/ucsd_test6.avi
