# Supplementary material
Source: ML conference proceedings conference paper supplement (https://openaccess.thecvf.com/content/ICCV_2017/html/Xiong_Spatiotemporal_Modeling_for_ICCV_2017_paper.html)
Supplement: Supplementary file 1 [file Xiong_Spatiotemporal_Modeling_for_ICCV_2017_supplemental.pdf › video demos/Descriptions.pdf]

# Descriptions

March 27, 2017

Our supplementary material contains six video clips which are video demos for the UCSD dataset. These video demos are generated by combining raw images and estimated density maps. There are 2,000 annotated frames in total. We use frames 601-1,400 as the training data and the remaining 1,200 frames as test data. Each video clip contains 200 frames at fps 10.
